# Supplementary material for: Tunable Low Frequency Band Gap and Waveguide of Phononic Crystal Plates with Different Filling Ratio
Source: MDPI journal article supplement (doi:10.3390/cryst11070828), 2021-07-16
Supplement: s1 [file s1]

Archive with 1 entries (1 files):
- crystals-1282398-supplementary.pdf
